# Supplementary material for: Simultaneous Identification of Multiple Driver Pathways in Cancer
Source: PLOS journal article supplement (doi:10.1371/journal.pcbi.1003054), 2013-05-23
Supplement: S14 (10.1371/journal.pcbi.1003054.s014) [file journal.pcbi.1003054.s014]

| $m$ | <b>100</b> | <b>200</b> | <b>400</b> | <b>800</b> | <b>1600</b> | <b>3200</b> | <b>6400</b> | <b>12800</b> | <b>22000</b> |
|-----|------------|------------|------------|------------|-------------|-------------|-------------|--------------|--------------|
|-----|------------|------------|------------|------------|-------------|-------------|-------------|--------------|--------------|

|            |      |      |       |       |       |        |        |        |        |
|------------|------|------|-------|-------|-------|--------|--------|--------|--------|
| $q = 0.02$ | 51.8 | 93.4 | 185.4 | 357.8 | 722.7 | 1409.3 | 2826.6 | 5663.4 | 9698.4 |
|------------|------|------|-------|-------|-------|--------|--------|--------|--------|

|               |      |      |    |      |       |       |       |      |        |
|---------------|------|------|----|------|-------|-------|-------|------|--------|
| $q = 0.00001$ | 24.2 | 34.9 | 54 | 88.1 | 169.1 | 312.9 | 617.2 | 1236 | 2108.4 |
|---------------|------|------|----|------|-------|-------|-------|------|--------|
