# Supplementary material for: Simultaneous Identification of Multiple Driver Pathways in Cancer
Source: PLOS journal article supplement (doi:10.1371/journal.pcbi.1003054), 2013-05-23
Supplement: S16 (10.1371/journal.pcbi.1003054.s016) [file journal.pcbi.1003054.s016]

| <b>GBM(2008)</b> |         |       |       |  | <b>GBM</b> |         |         | <b>BRCA</b> |       |       |
|------------------|---------|-------|-------|--|------------|---------|---------|-------------|-------|-------|
| $k$              | 3       | 4     | 5     |  | 3          | 4       | 5       | 3           | 4     | 5     |
| $t = 2$          | 0.005   | 0.026 | 0.032 |  | < 0.001    | < 0.001 | < 0.001 | 0.166       | 0.17  | 0.184 |
| $t = 3$          | < 0.001 | 0.021 | 0.046 |  | < 0.001    | 0.001   | 0.001   | 0.05        | 0.26  | 0.72  |
| $t = 4$          | 0.001   | 0.002 | 0.043 |  | 0.013      | 0.006   | 0.002   | 0.003       | 0.005 | 0.103 |
