# Supplementary material for: Simultaneous Identification of Multiple Driver Pathways in Cancer
Source: PLOS journal article supplement (doi:10.1371/journal.pcbi.1003054), 2013-05-23
Supplement: S17 (10.1371/journal.pcbi.1003054.s017) [file journal.pcbi.1003054.s017]

**GBM(2008)****GBM****BRCAs** $k_{\max}$ 

3

4

5

3

4

5

3

4

5

 $t = 2$ 

0

0

3

0

0

1

6

8

10

 $t = 3$ 

6

6

13

0

0

1

9

12

15

 $t = 4$ 

4

10

15

0

0

1

12

16

20
